# Supplementary material
Source: PubMed Central journal article supplement (PMC6124439)

951  
952  
953  
954  
955  
956  
957  
958  
959  
960  
961  
962  
963  
964  
965  
966  
967  
968  
969  
970  
971

972 **Supplemental Figure 1. Anxiety phenotype in NF1 mutant miniswine.** 9-10 month old, male  
973 *NF1<sup>+/-ex42del</sup>* miniswine took significantly longer to touch a novel object compared to control animal,  
974 though they spent a similar amount of time with that same object (A). When miniswine were  
975 exposed to a second novel object, in addition to the first object, the next day, this interaction delay

976 was no longer present (B). Data presented as mean  $\pm$ SEM. Outliers removed with ROUT method  
977 Q=1%. \*p<0.05, Unpaired two-tailed Student's *t*-test. N=5-12.

978

979 **Supplemental Figure 2. Neurofibromas present on miniswine.** Neurofibromas (arrows) on the  
980 neck of a 17 month old, male *NF1*<sup>+/*ex42del*</sup> mutant miniswine showing appearance of the skin (A).  
981 Heterogeneous contrast enhancement is seen in the T2-weighted MR of two of the lesions from  
982 the same animal (B and D). The pre-contrast LAVA MR show hyperintensity in (C) but not in (E).

983

984 **Supplemental Figure 3. Neurofibroma tissues from an NF1 mutant miniswine.** Serial  
985 sections of the cutaneous neurofibroma isolated from an *NF1*<sup>+/*ex42del*</sup> animal are outlined by arrows  
986 (A, B) allowing visualization of the neurofibroma (A) and increased vWF immunostaining (B) in a  
987 serial section. Note the increased vWF immunostaining (brown staining) within the neurofibroma  
988 (C, arrows). Trichrome stain (A) and vWF immunohistochemistry with hematoxylin counterstain.  
989 Bar = 313 (A, B) and 63 (C)  $\mu$ m, respectively.

990

991 **Supplemental Figure 4. Histopathological features of neurofibromas from an NF1 mutant**  
992 **miniswine.** Sections of the cutaneous tumors under polarized light show the normal "white"  
993 dermal collagen fibers that distinguished the dark (black) regions of neurofibromas (white arrows)  
994 in the dermis (A, B). Within the neurofibromas, uncommon aggregates of eosinophils (C, inset)  
995 and mast cells (D, black arrows and inset) were detected. Sirius red (A-C) and toluidine blue  
996 stains (D). Bar = 627 (A), 125 (B), 62 (C) and 20 (D)  $\mu$ m, respectively.

997

998 **Supplemental Table 1.** Primers used for sequencing, amplify NF1 genomic region, Targeting  
999 Vector Construction, rAAV Production, and Cell Screening. Primers listed from 5' to 3'.

1000

|                                                    |
|----------------------------------------------------|
| Primers used to amplify <i>NF1</i> genomic region: |
| pNF1-1F: AATTTACTGAGCAAGCCATTTCTTTTGCTG            |

|                                                                       |
|-----------------------------------------------------------------------|
| pNF1-4R: GATCTTCAGGTATACTTTACCCAGCTTTAC                               |
| <u>Primers used for sequencing:</u>                                   |
| pNF1seq5F: AAATGGGGAGAGCACTTTAATTAT                                   |
| pNF1seq6F: GGTCAGCTGCCTATAATCTTCTGT                                   |
| pNF1seq7F: GATTTTAGGGATATAGTCATTTCCG                                  |
| pNF1seq8F: GCTATGAGGTTTGAGAATTAAGAA                                   |
| pNF1seq9R: CCTCCTACGGTGAATATAAGGTCT                                   |
| pNF1seq10F: AAGAGAAATGGAGTTCTGTCATGG                                  |
| pNF1seq11F: AAGATAATATATATATATATCCACT                                 |
| pNF1seq12F: CTGTTGCCATAGGTCTATTTTGCA                                  |
| pNF1seq13F: GAGATCAGATGATACACCAATAGT                                  |
| pNF1seq14R: GCTGCTGGCCAACGCTACAGCAGA                                  |
| pNF1seq15F: TAGTACCTCCTTGATGCAGATATT                                  |
| pNF1seq16F: ATGTGGGTCGGTGTGCTGCAGGC                                   |
| pNF1seq17F: TGGACTGCTCCTTGAAAGTTTGTT                                  |
| AAVF1: CTCTAGCTATAGTTCTAGTGG                                          |
| AAVR2: GTGGTATGGCTGATTATGATC                                          |
| pLDLR1: GGAGCATGCGCTTTAGCAG                                           |
| p1338-puro B-F (short): CGCGCTGTTCTCCTCTTCC                           |
| p1338-puro B-R (short): GAAGGCACAGTCGAGGCTG                           |
| ScreenF (NeoR): AGACGTGCTACTTCCATTTGTCAC                              |
| <u>Primers used for Targeting Vector Construction:</u>                |
| pNF1XhoI5armF28: AGTGATAGATGGGAACTCGAGGAA                             |
| pNF1SbfI5armR29: ATTCAATACCTCCTGCAGGAATACACATTA                       |
| pNF1SbfI3armF31: GGGAGCCTTGGGCAGGTCCTGCAGGCGCTG                       |
| pNF1Hind3armR33: TGTCTAGTAAAGCTTCGAGGAGGTCT                           |
| <u>Primers used for rAAV Production:</u>                              |
| pNF1Not46R: AGCATATGGAAGTTCCCAGGCGGCCGCTCTAATCGG                      |
| pNF1Not47F: TTCGAAATTGGCGGCCGCACAATTTCTCTAGAA                         |
| <u>Cell Screening Primers:</u>                                        |
| Screen F (NeoR): AGACGTGCTACTTCCATTTGTCAC                             |
| LDLR-Exon5R1: AGCACTGGAACTCGTCAGG                                     |
| <u>Primers used to detect excision of the Selectable Marker:</u>      |
| pNF1seq26F: AGATCAACAGTAACTTGGGGCATG                                  |
| pNF1Screen50R: TAGGTATCAGATAAATATCTGCATCA                             |
| <u>Primers used to amplify the Southern Blot Probes:</u>              |
| pNF1probe52F: TACTAGACAGTTTCATCAAGACCA                                |
| pNF1probe53R: CTTTGCTAATGCCAAACAGTAGGT                                |
| BlastCD-F: ATGAAGACCTTCAACATCTCTCAG                                   |
| BlastCD-R: GTTCCTGGTGTACTTGAGGGGGAT                                   |
| <u>Primers used for Genotyping Offspring of a Heterozygous Cross:</u> |
| pNF1shorGen72F: CATATAATTTTTGTGACCAT                                  |
| pNF1shorGen73R: TAAATATCTGCATCAAGGAGG                                 |

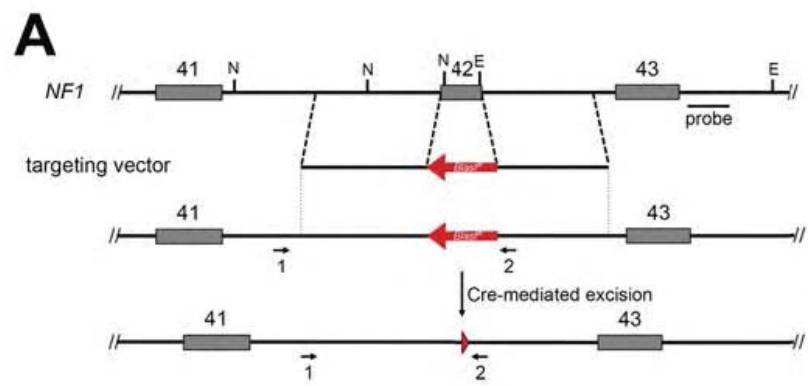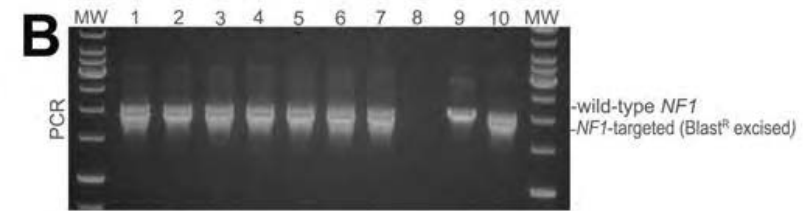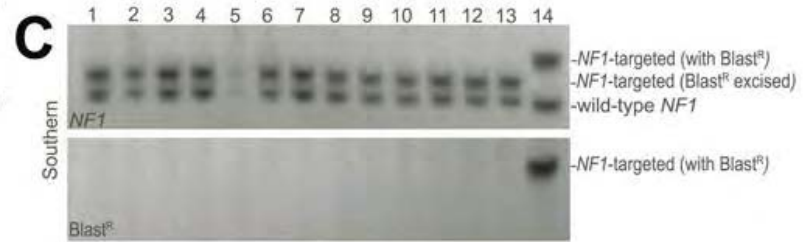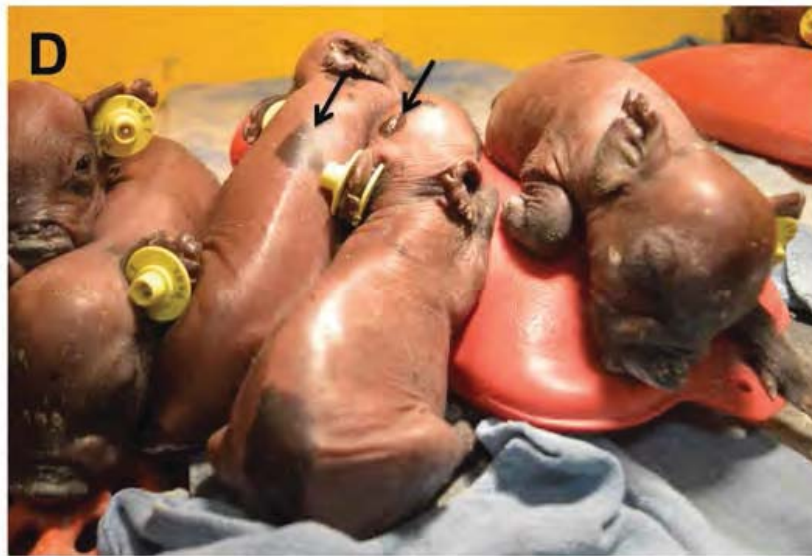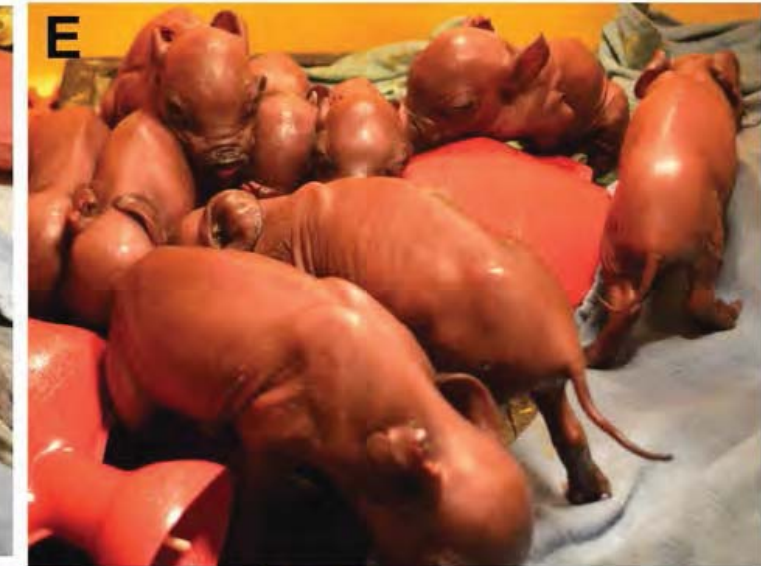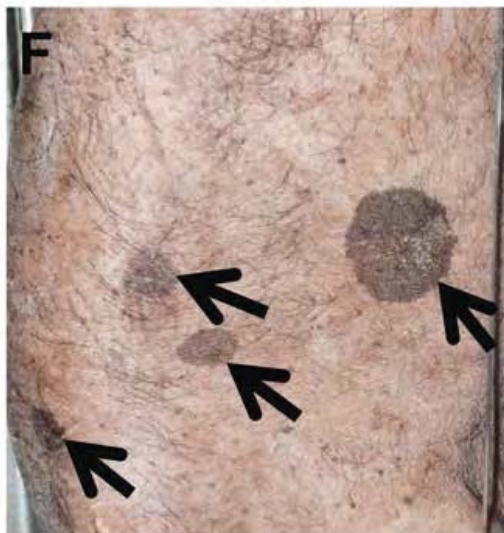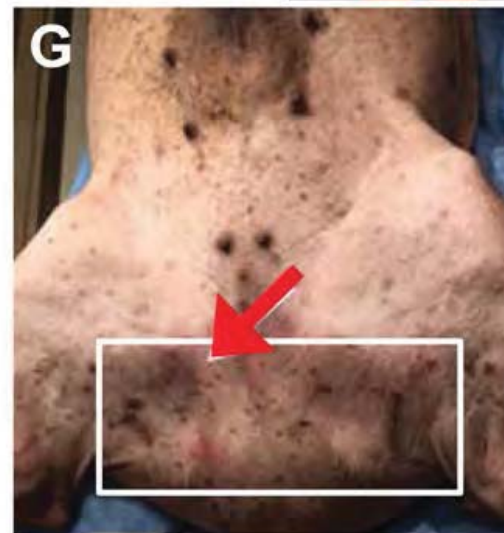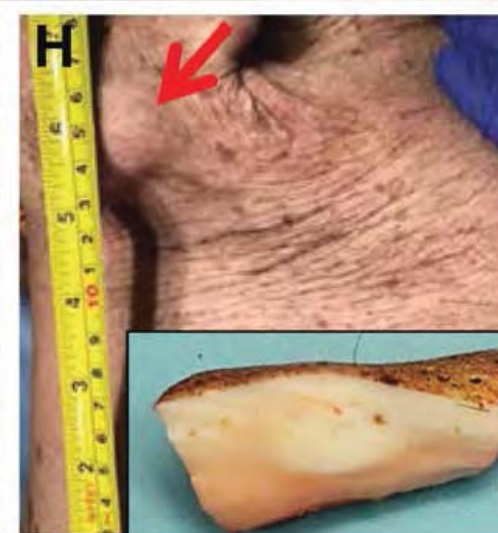

A

|                                                   | Café au Lait Spots Present | Tumor Lesion Present | Initial T-maze Learning Deficit |
|---------------------------------------------------|----------------------------|----------------------|---------------------------------|
| <i>NF1<sup>+/+</sup></i>                          | 0/6                        | 0/6                  | 0/5                             |
| <i>NF1<sup>+/<math>\Delta</math>ex42del</sup></i> | 18/18                      | 8/18                 | 3/7                             |

B

Observed Tumor Formation,  
Percent of Animals

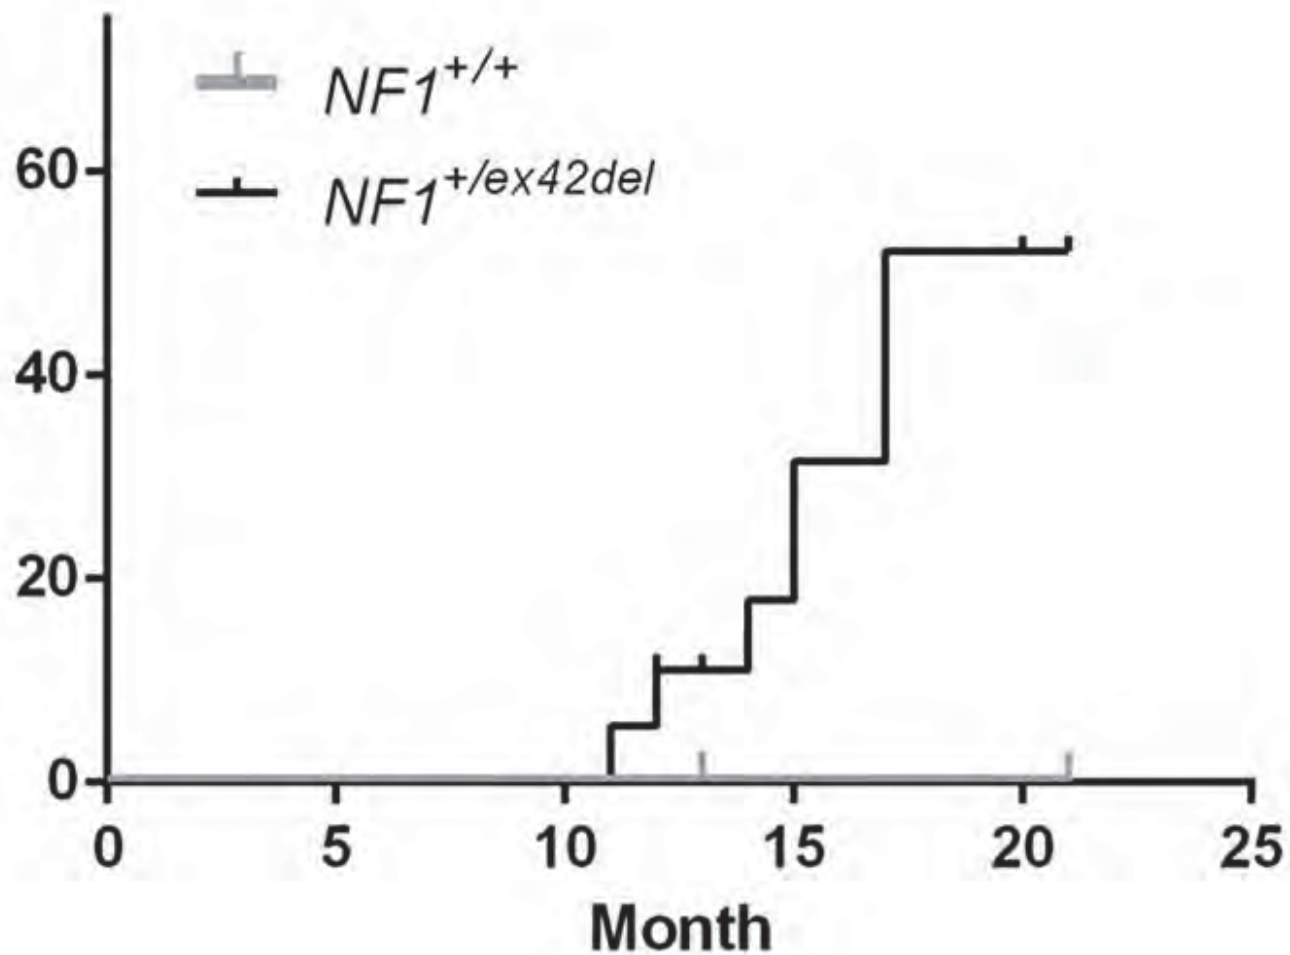



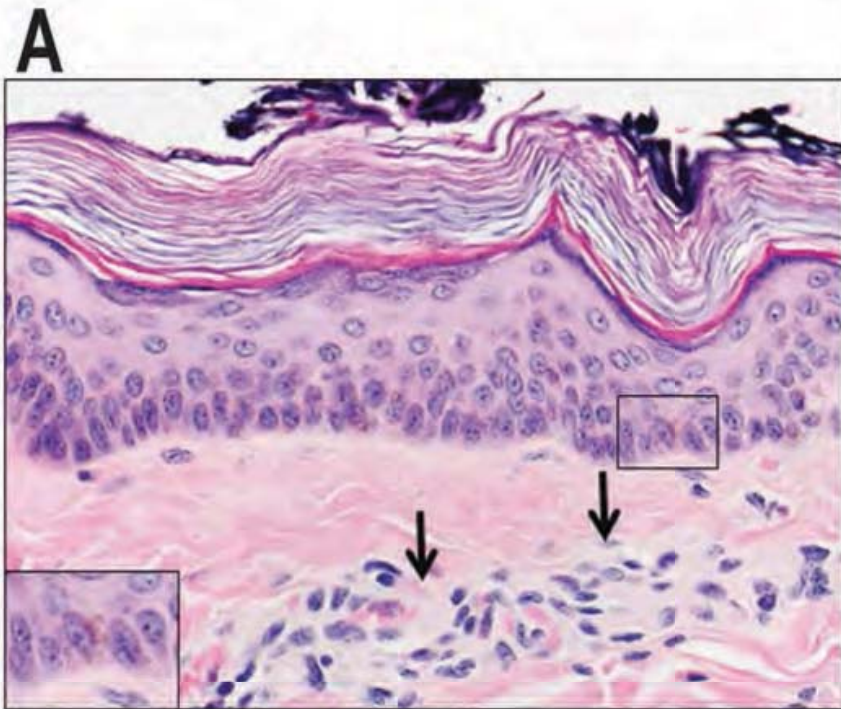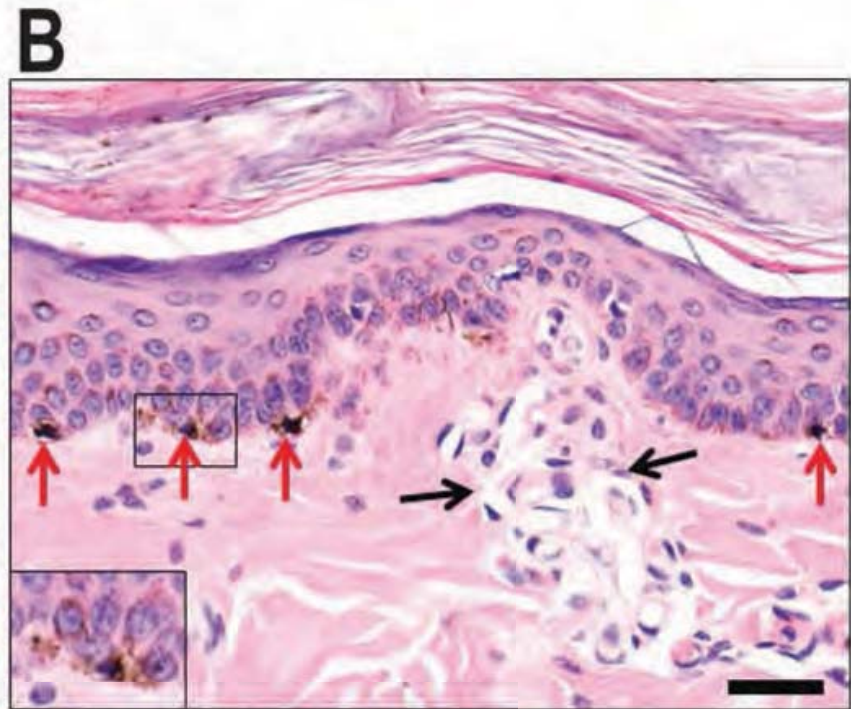

**C** Heavily-Pigmented Melanocytes

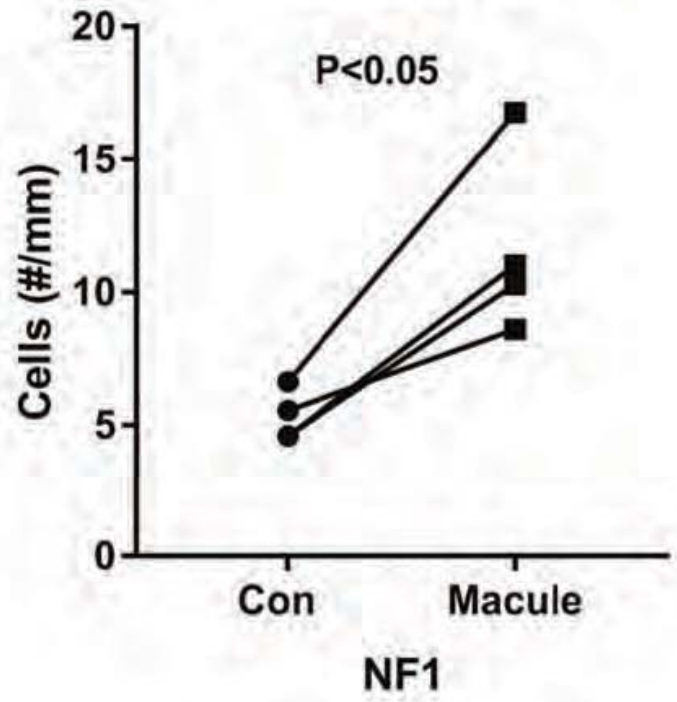

**D** Neurovascular Networks

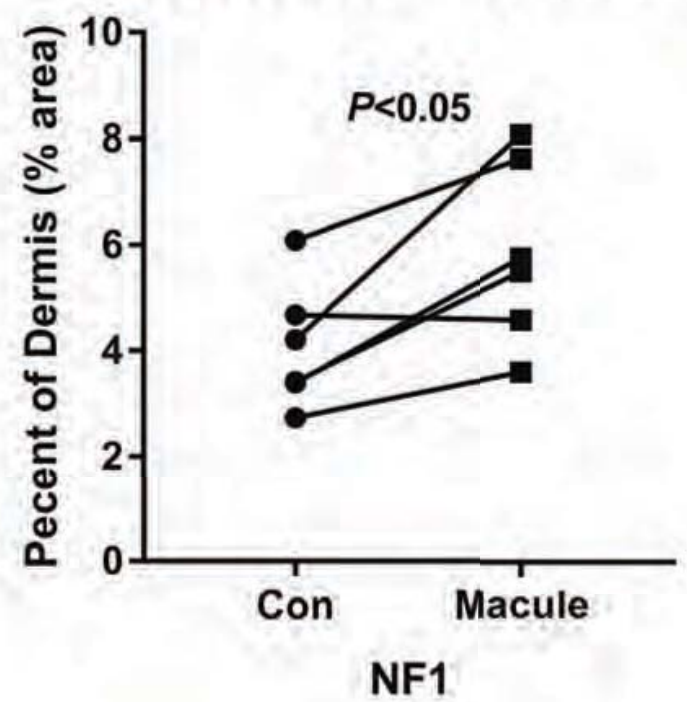



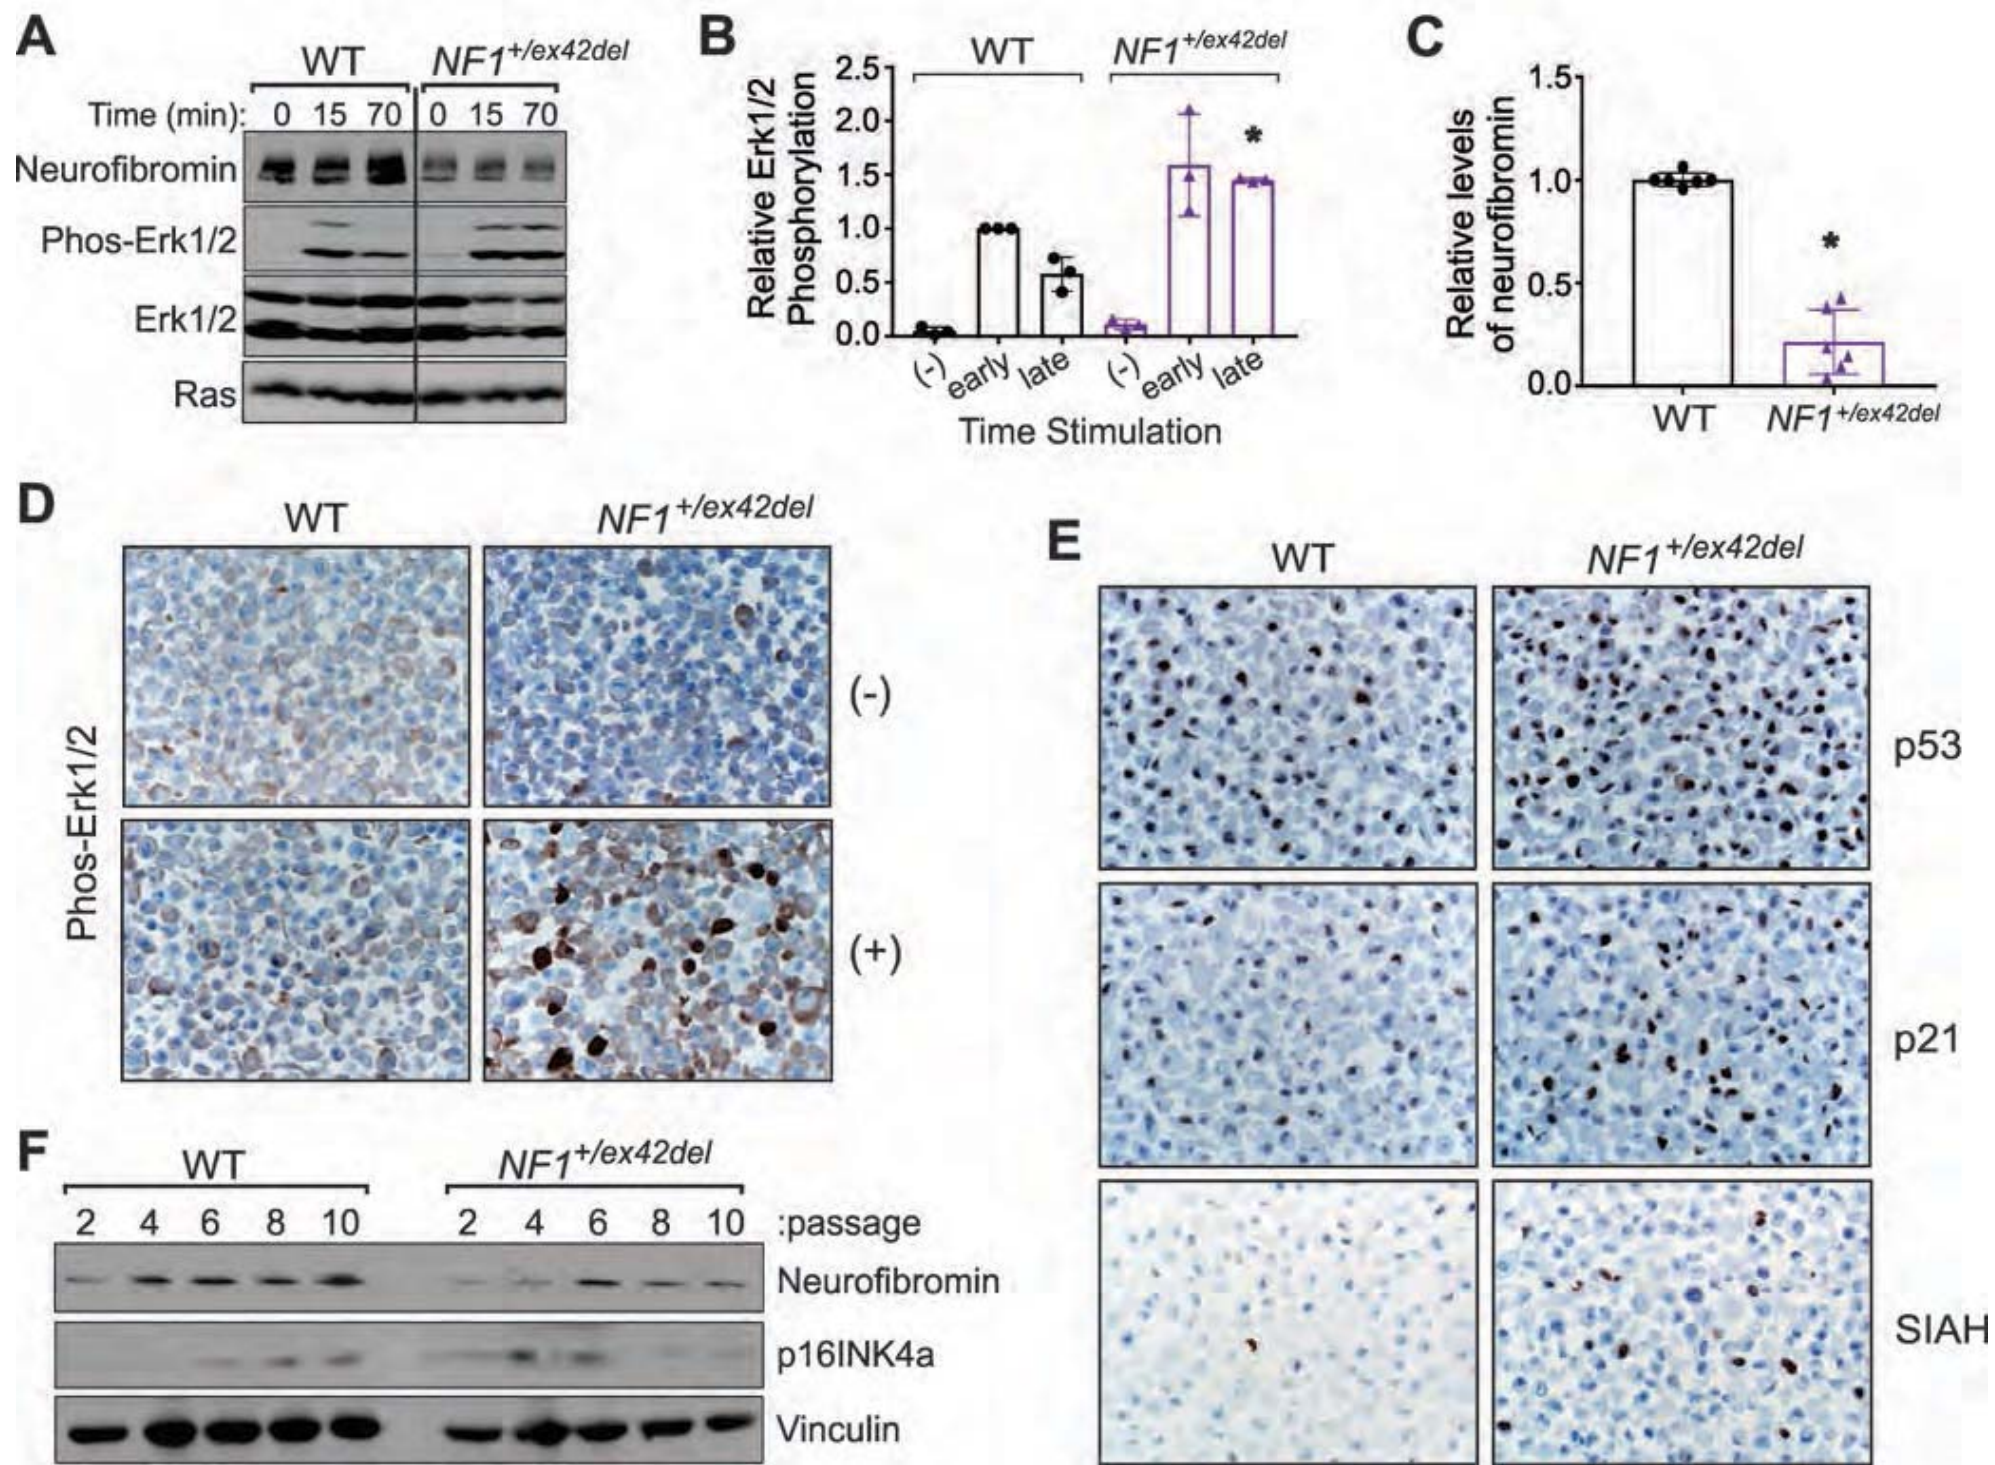

A

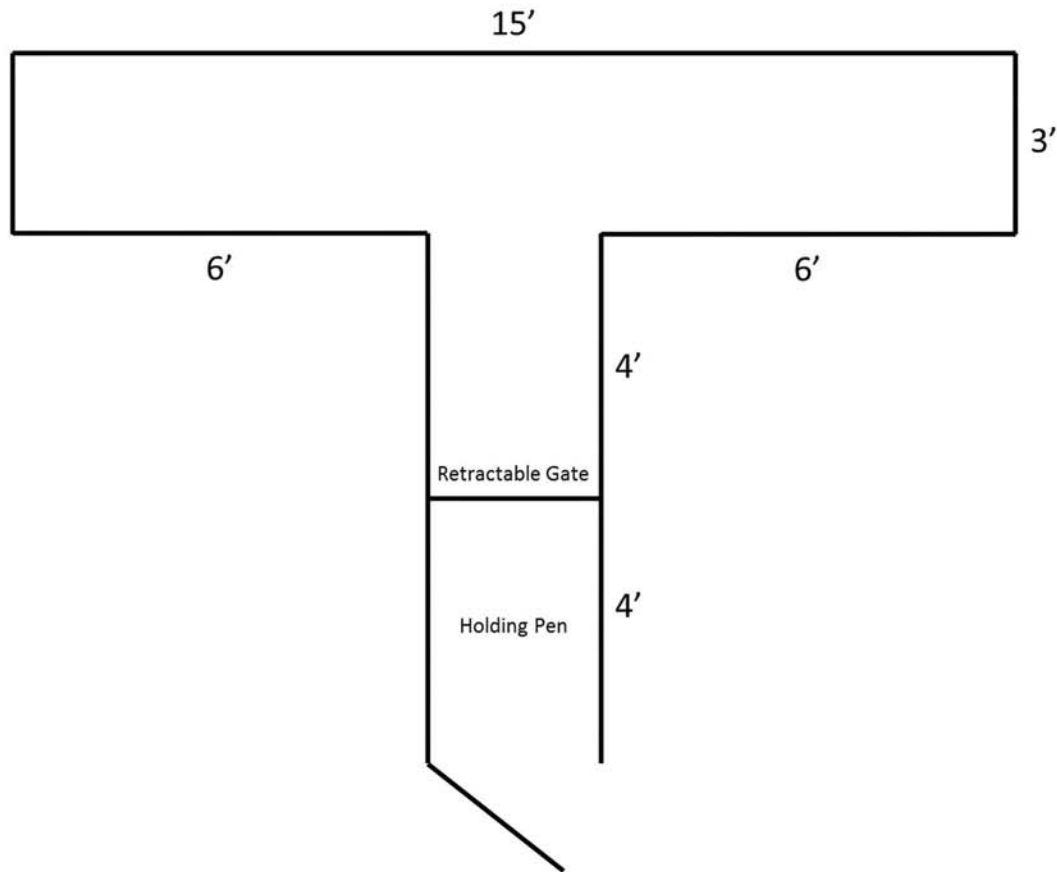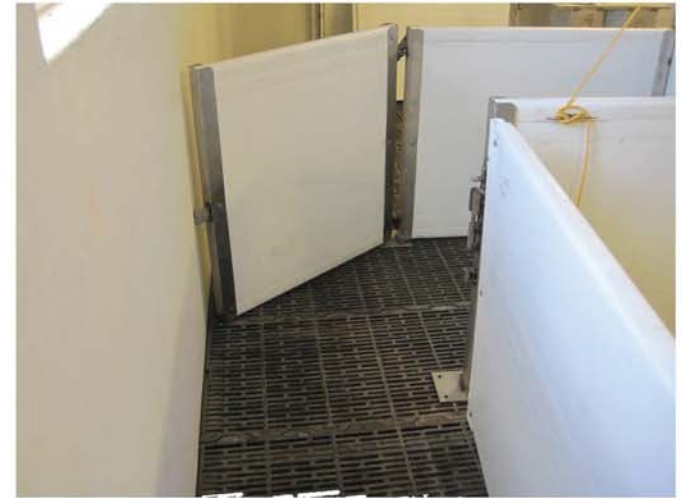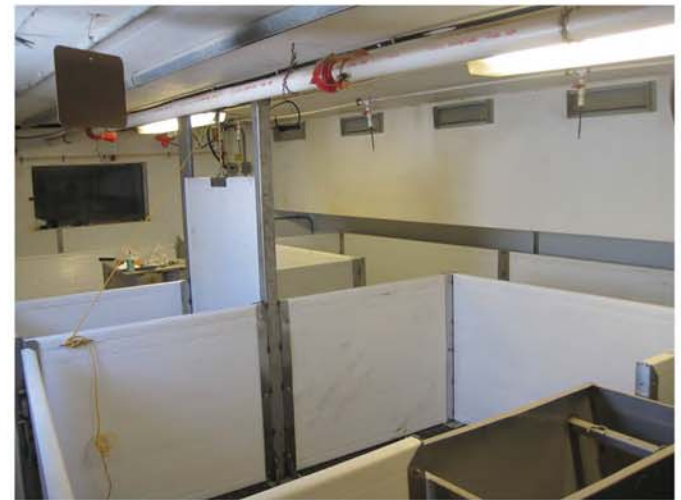

B

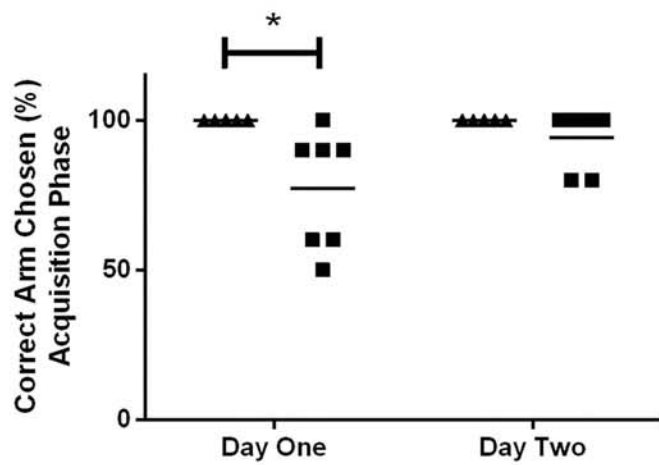

C

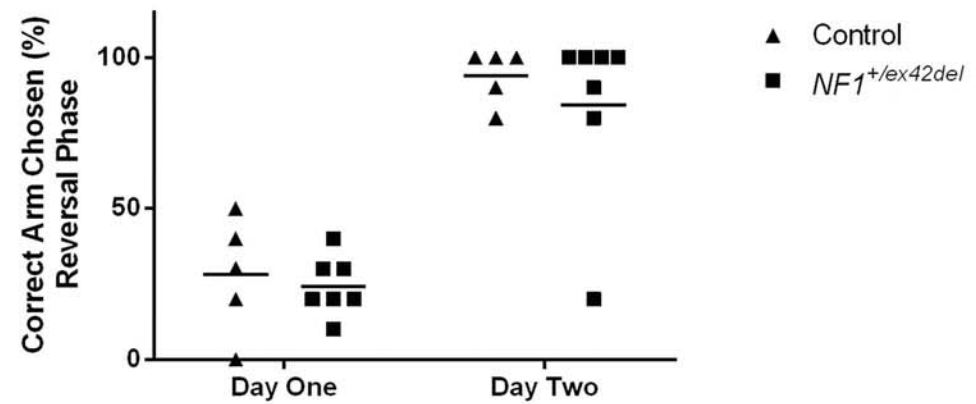



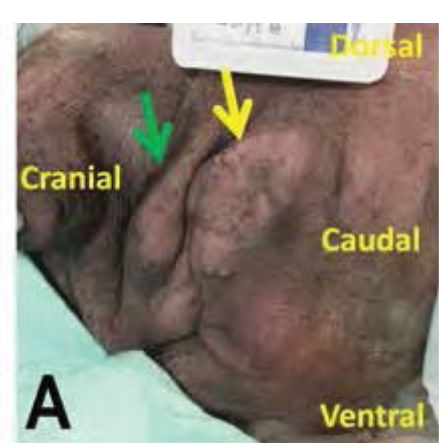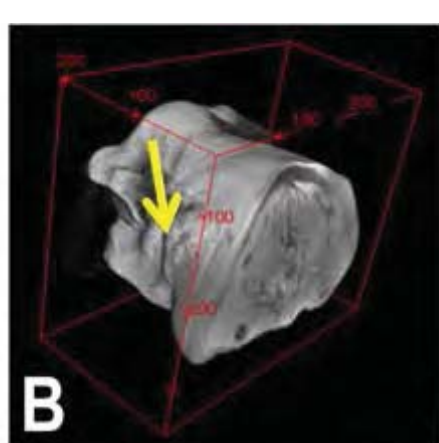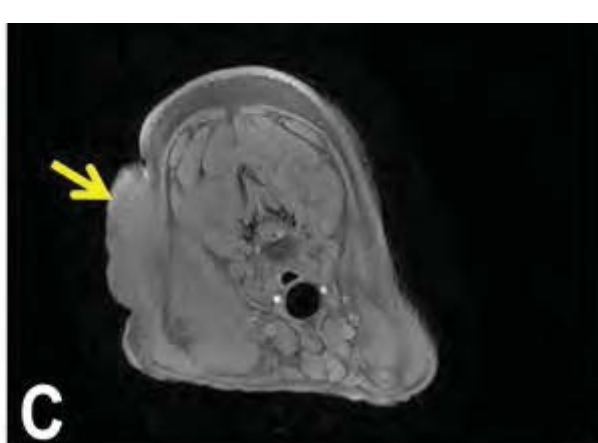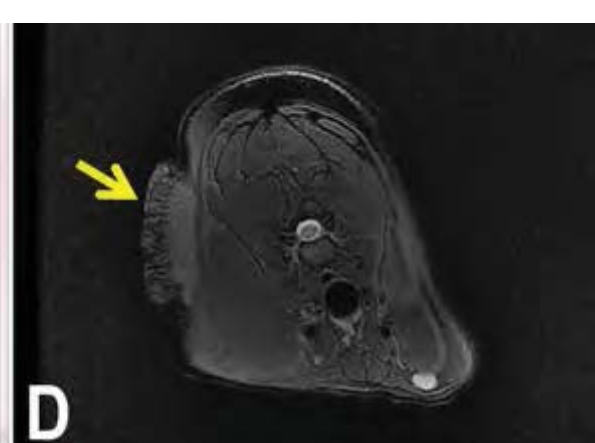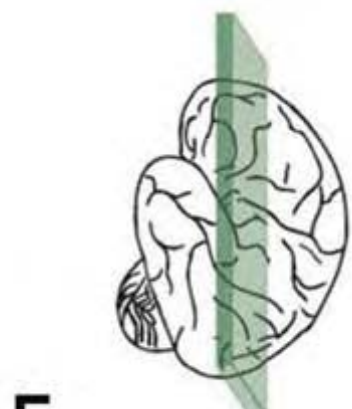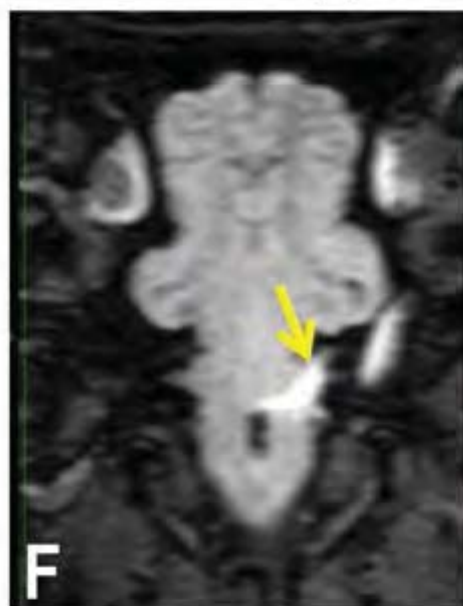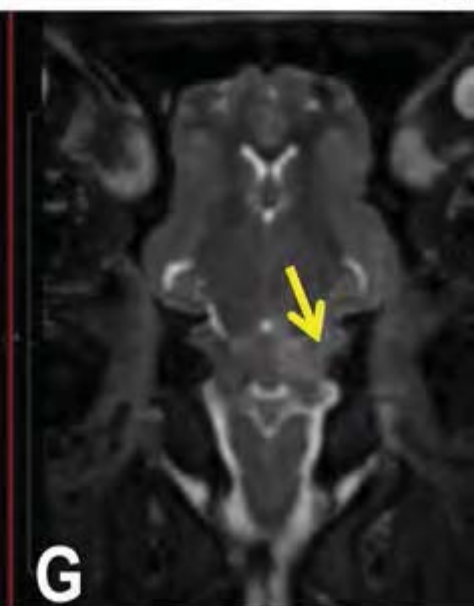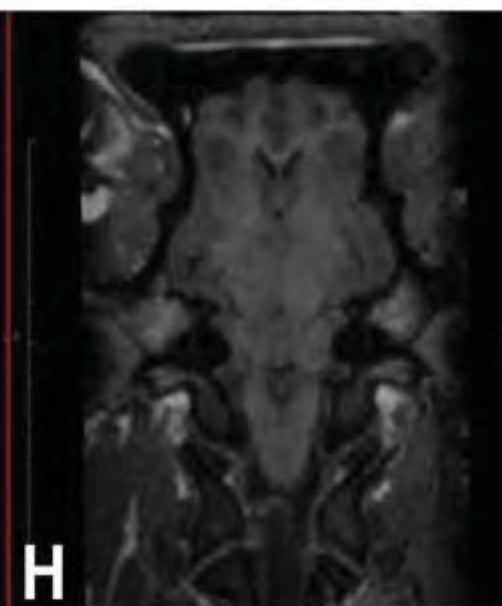

**E**

**F**

**G**

**H**

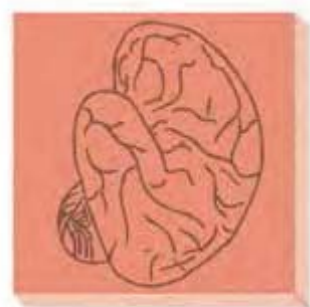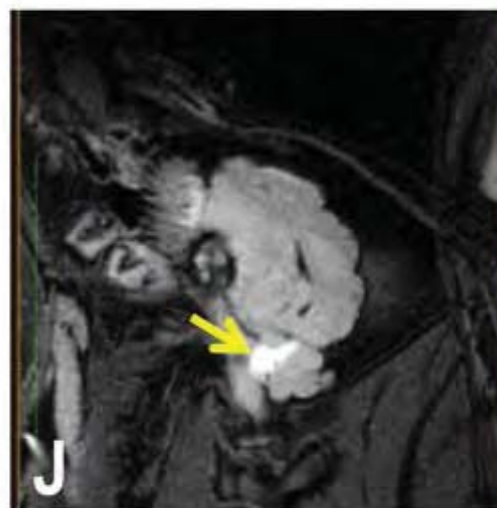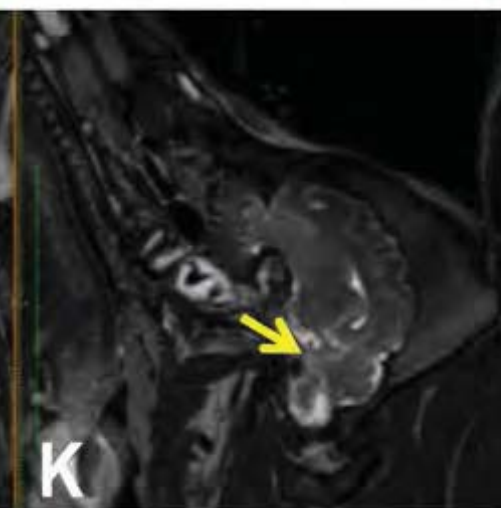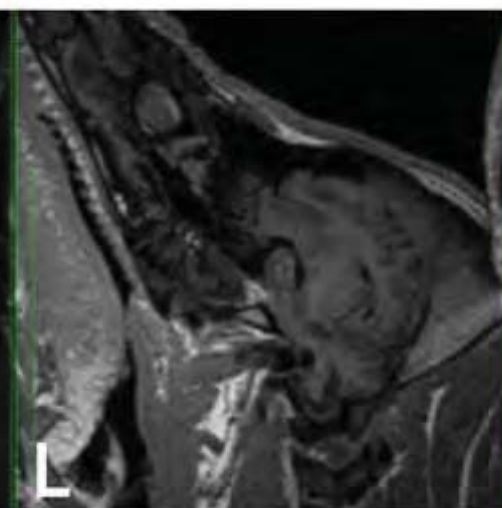

**I**

**J**

**K**

**L**

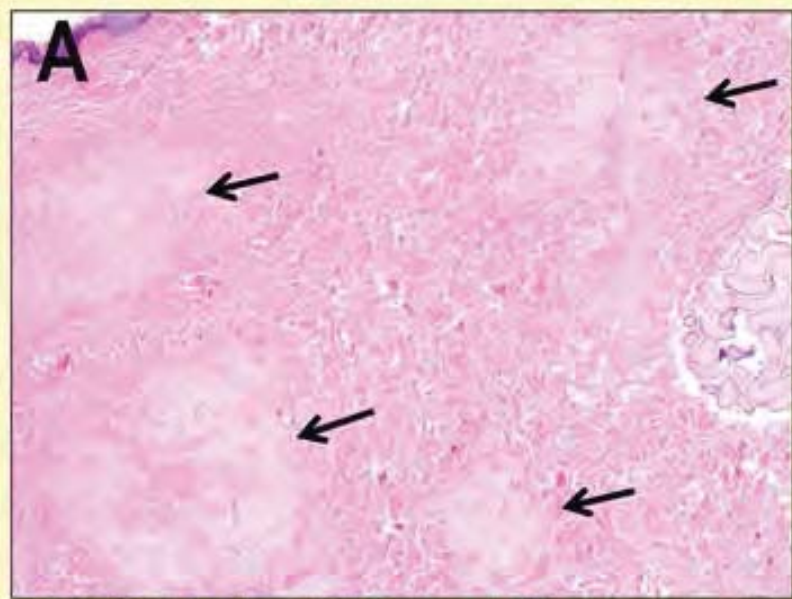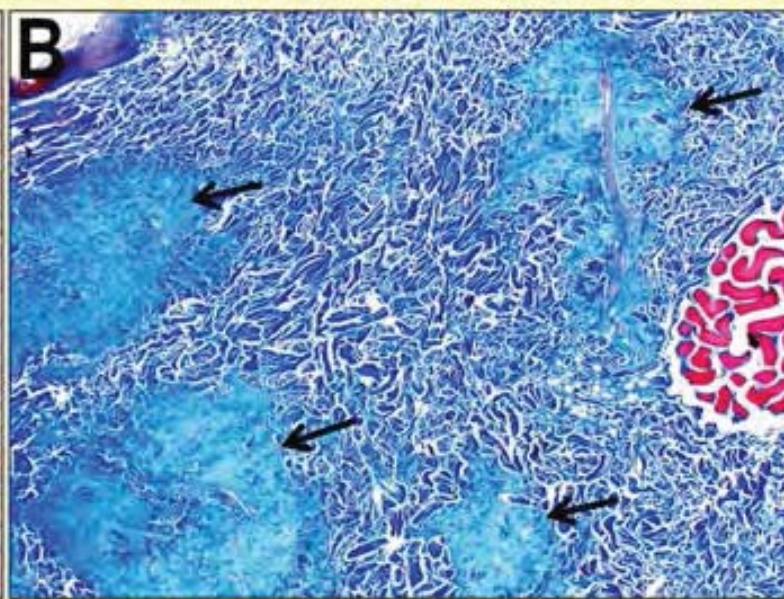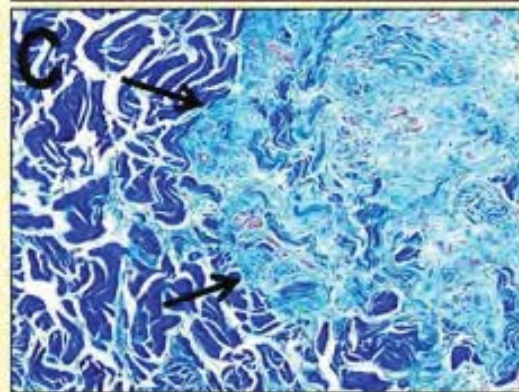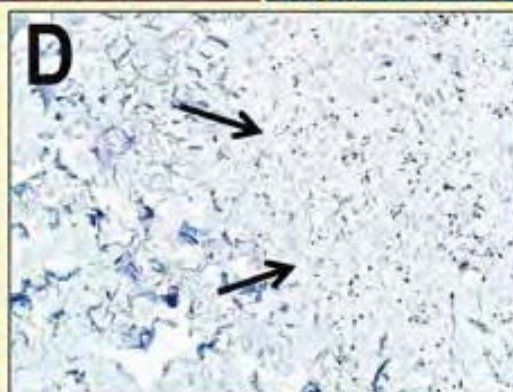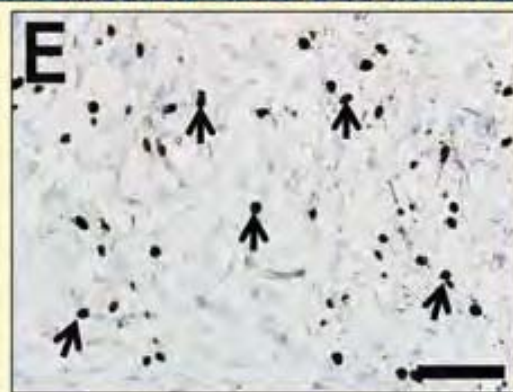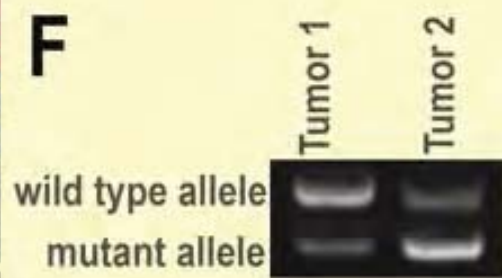



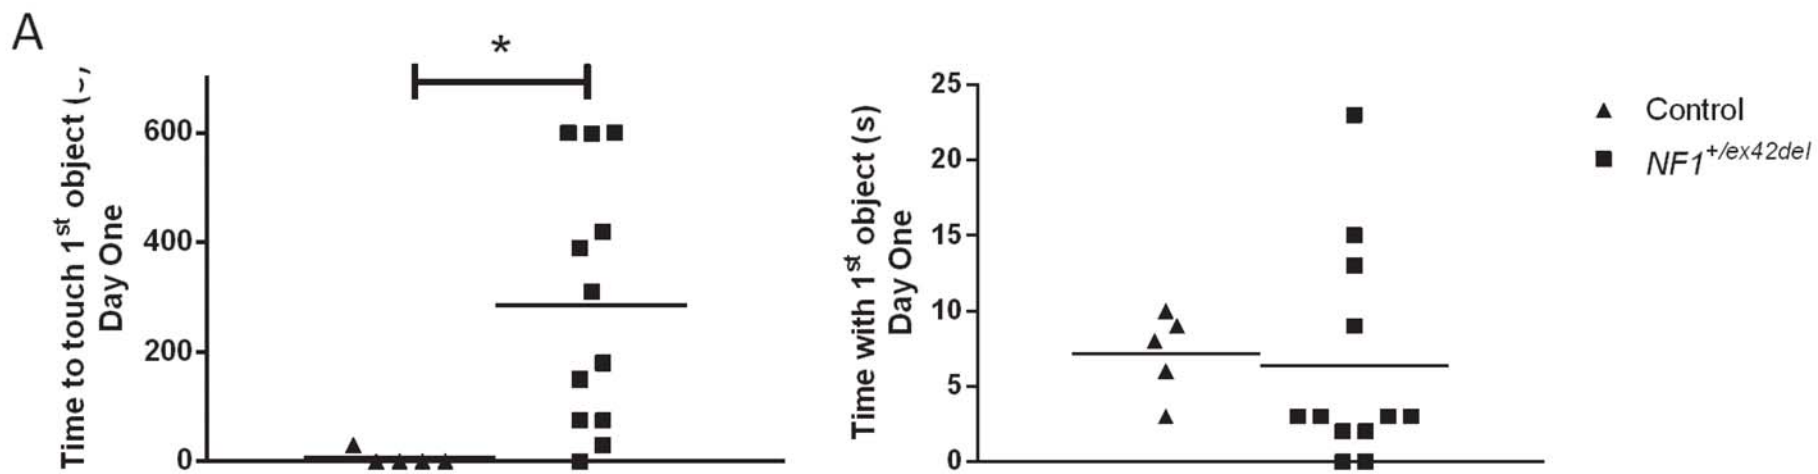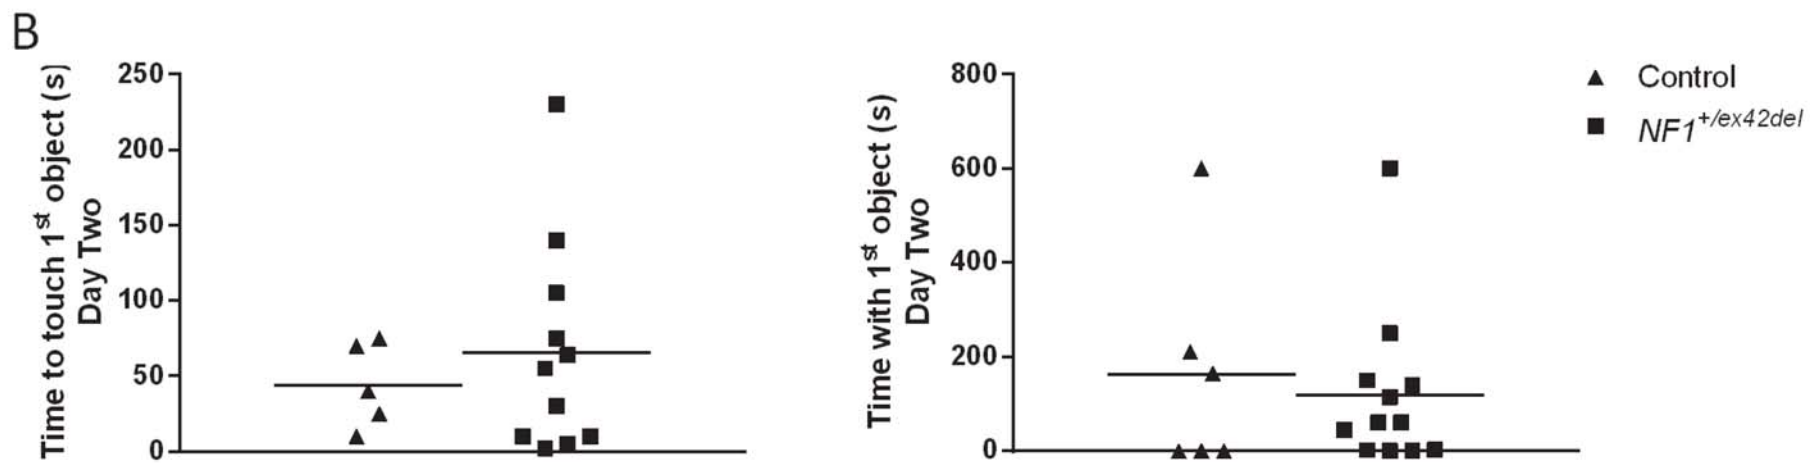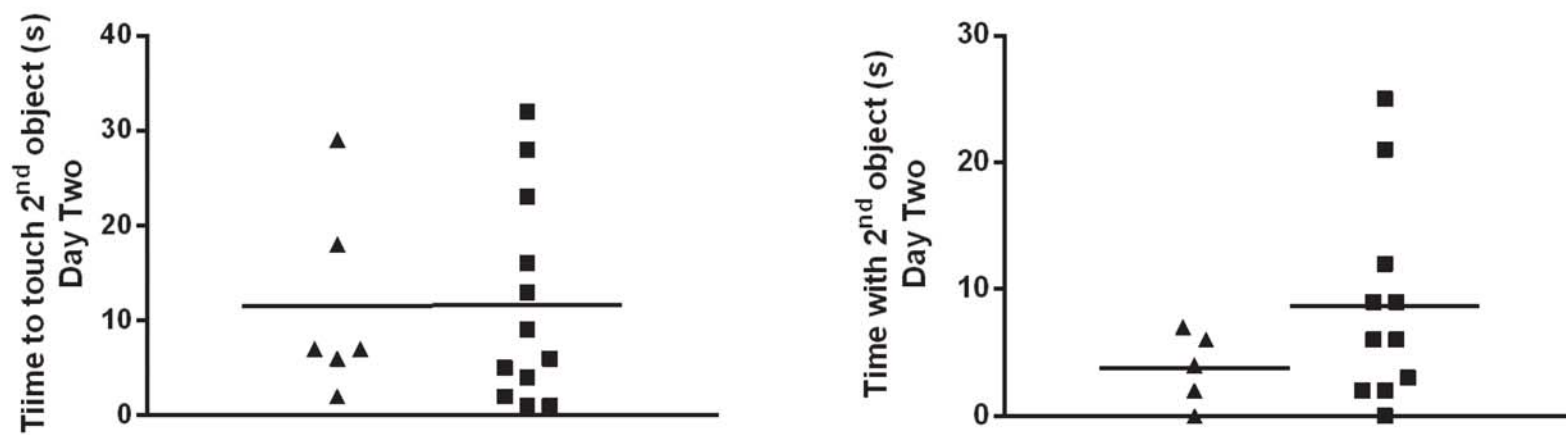



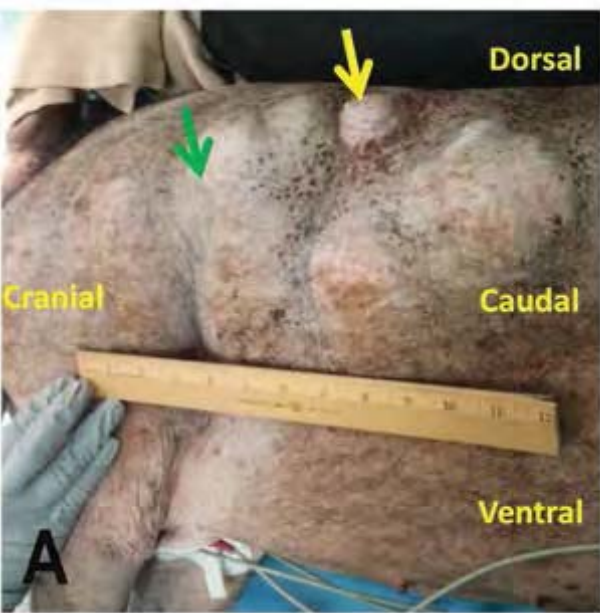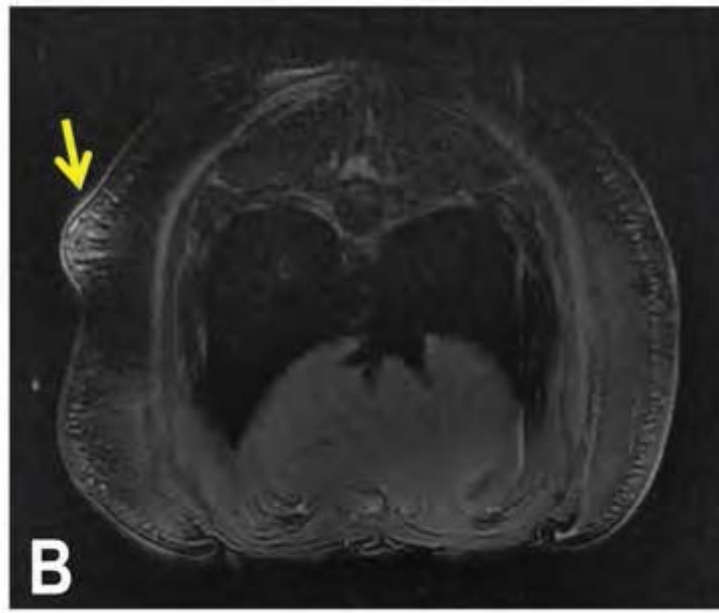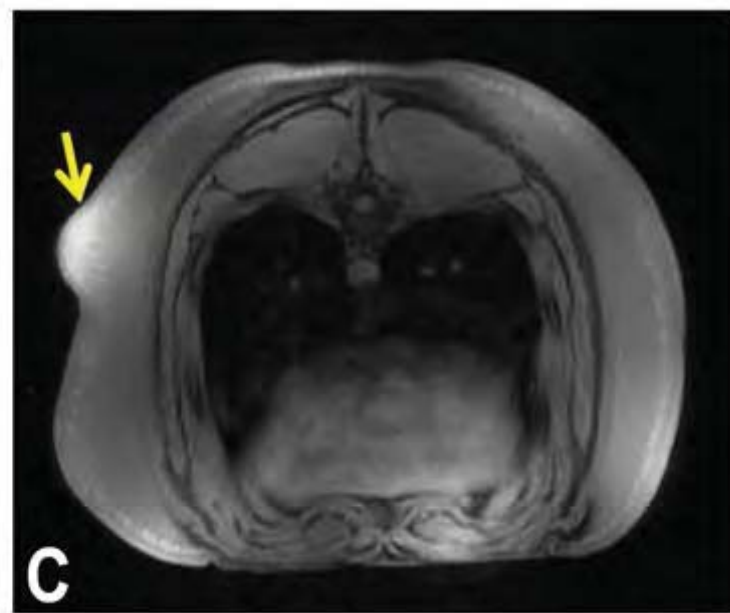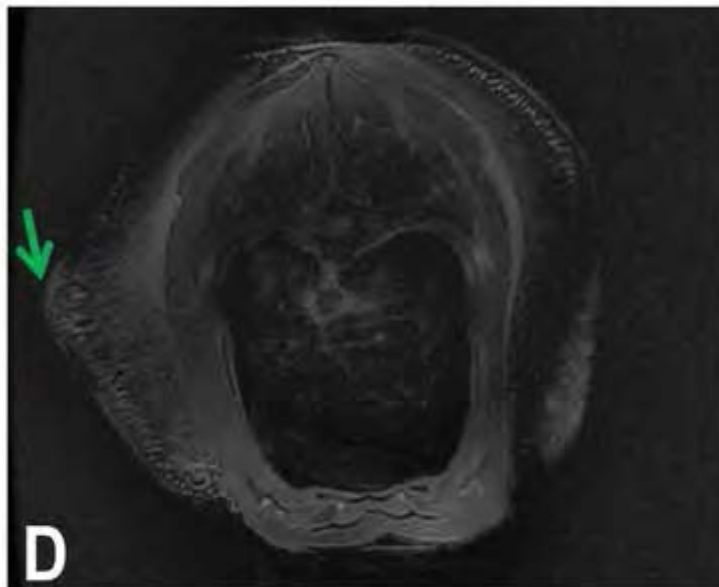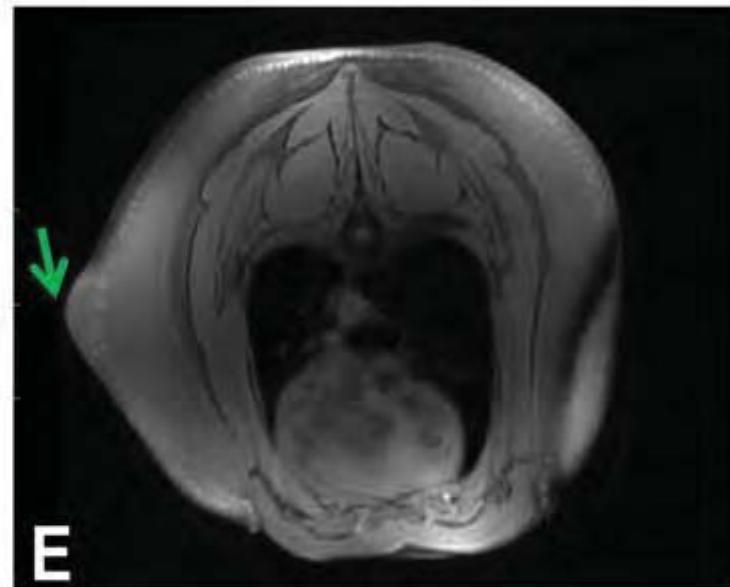

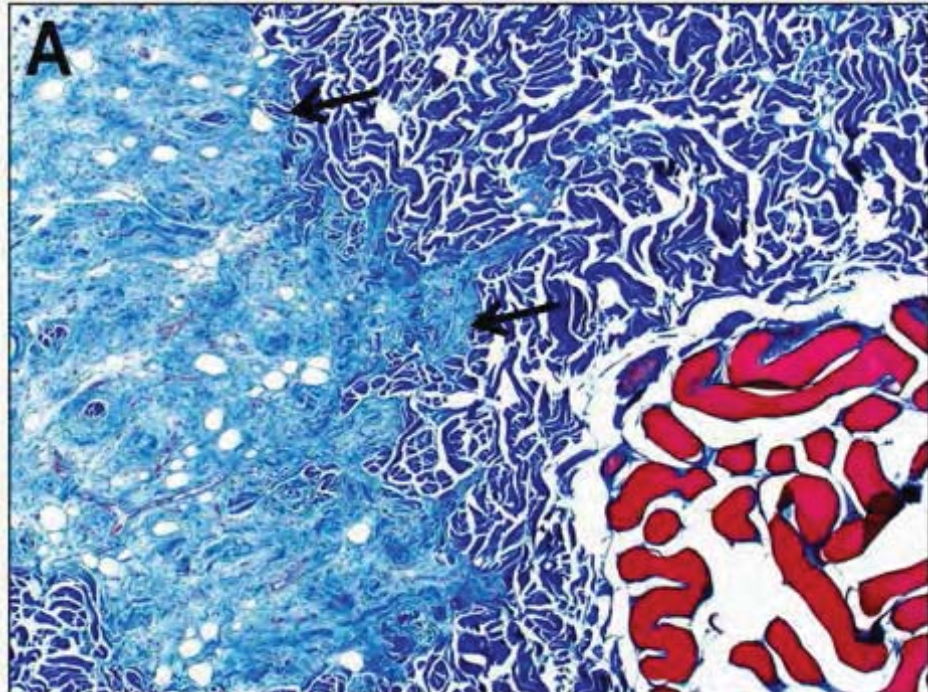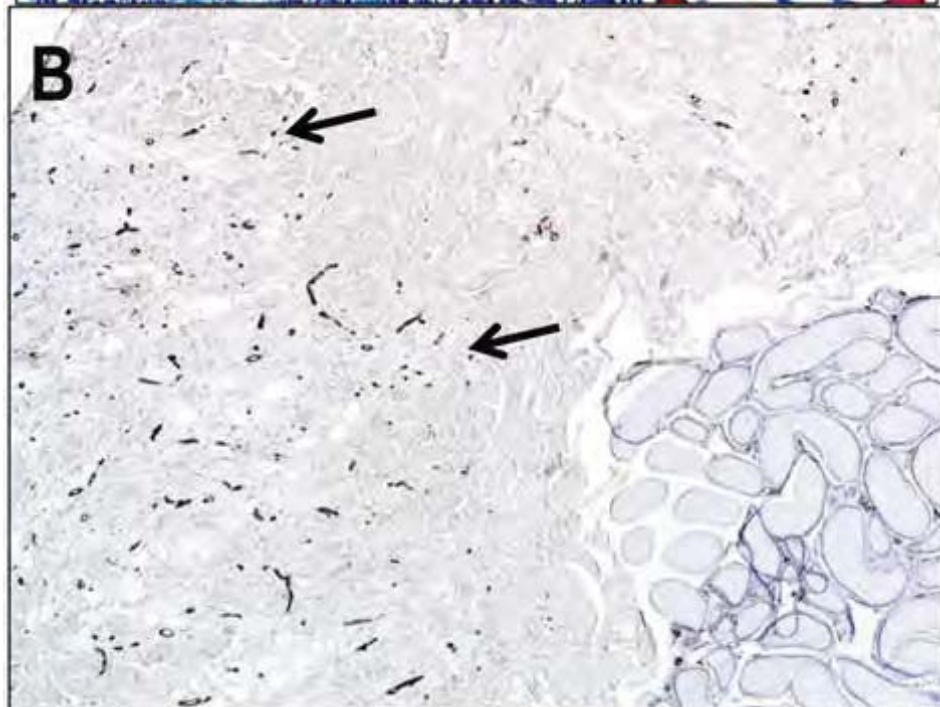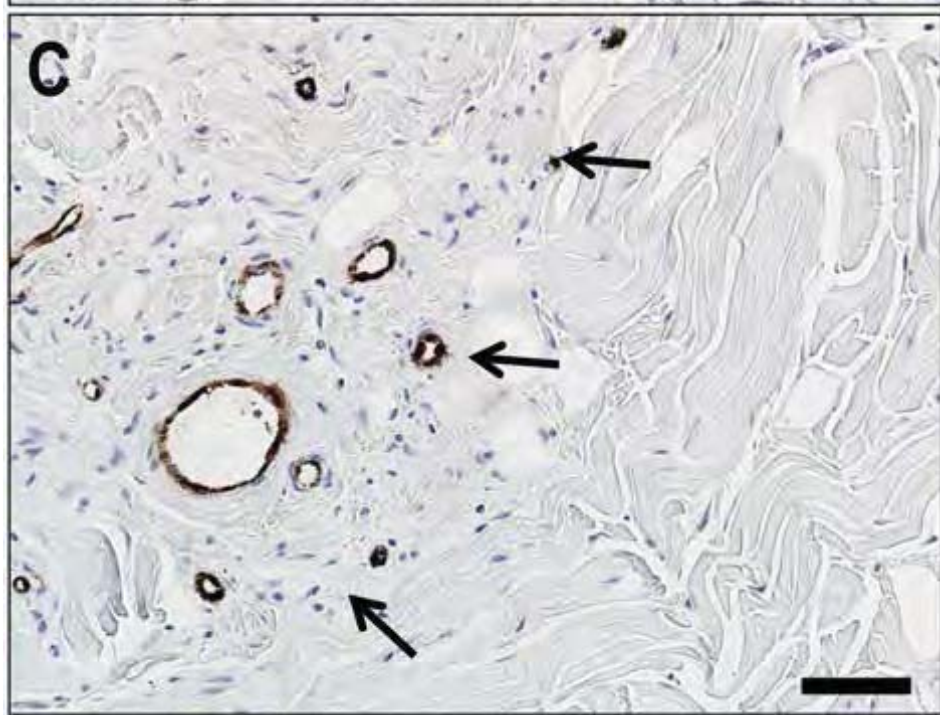



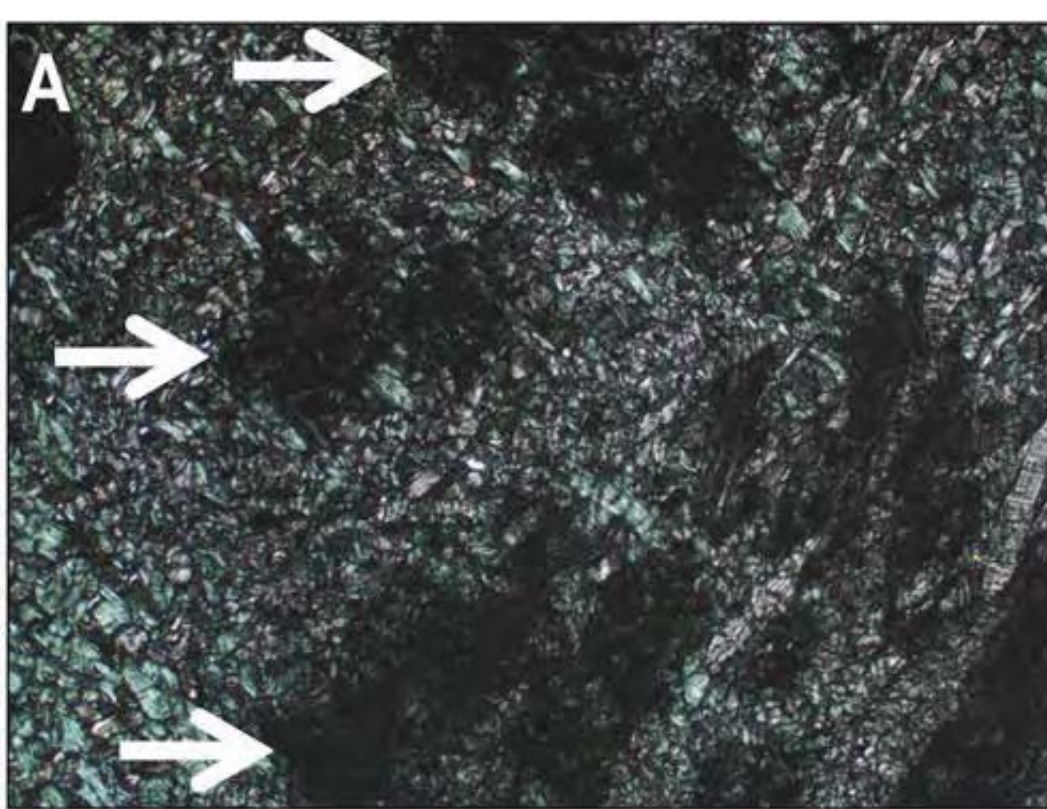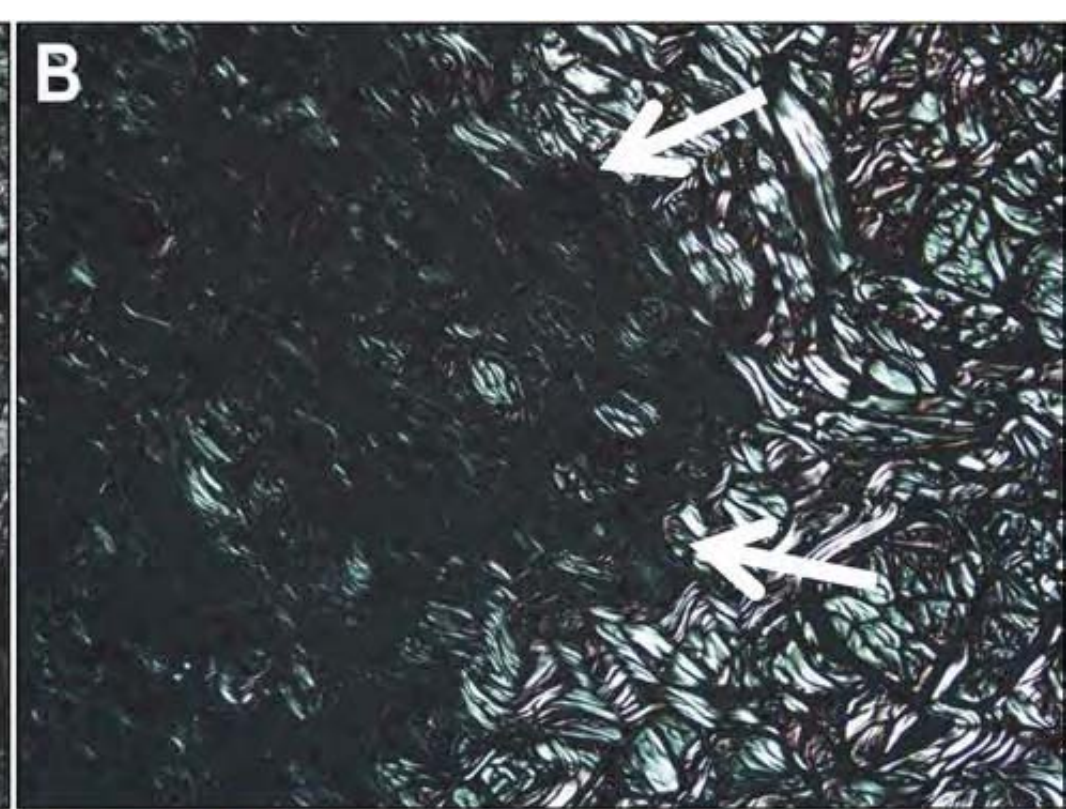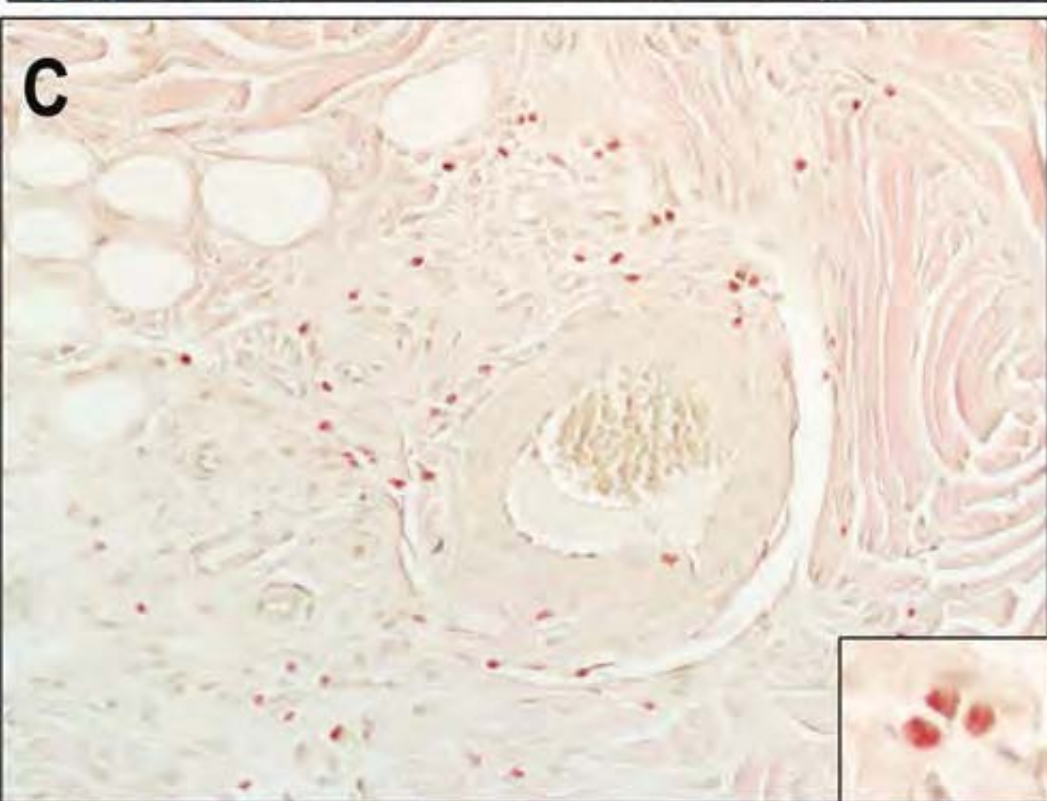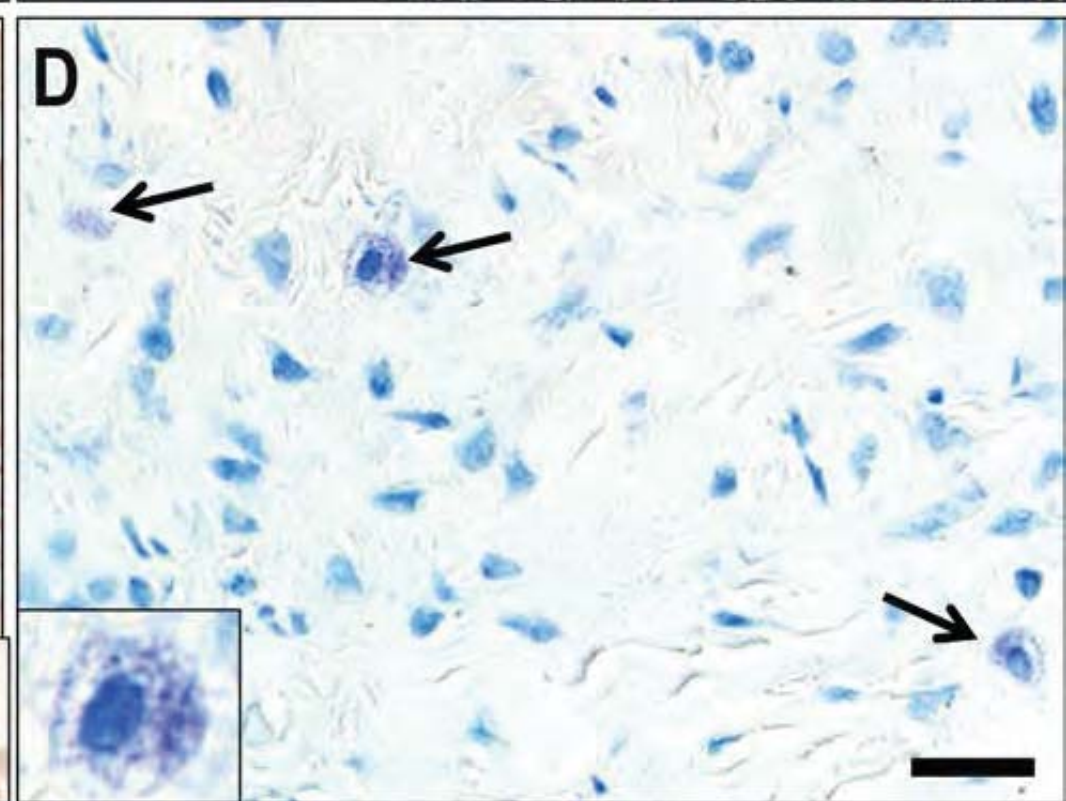

Supplement: jciinsight-3-120402-s149.pdf [file jciinsight-3-120402-s149.pdf]
